# Supplementary material for: Inter- and Intrasexual Variation in Cuticular Hydrocarbons in Trichrysis cyanea (Linnaeus, 1758) (Hymenoptera: Chrysididae)
Source: MDPI journal article supplement (doi:10.3390/insects13020159), 2022-02-01
Supplement: s1 [file s1]

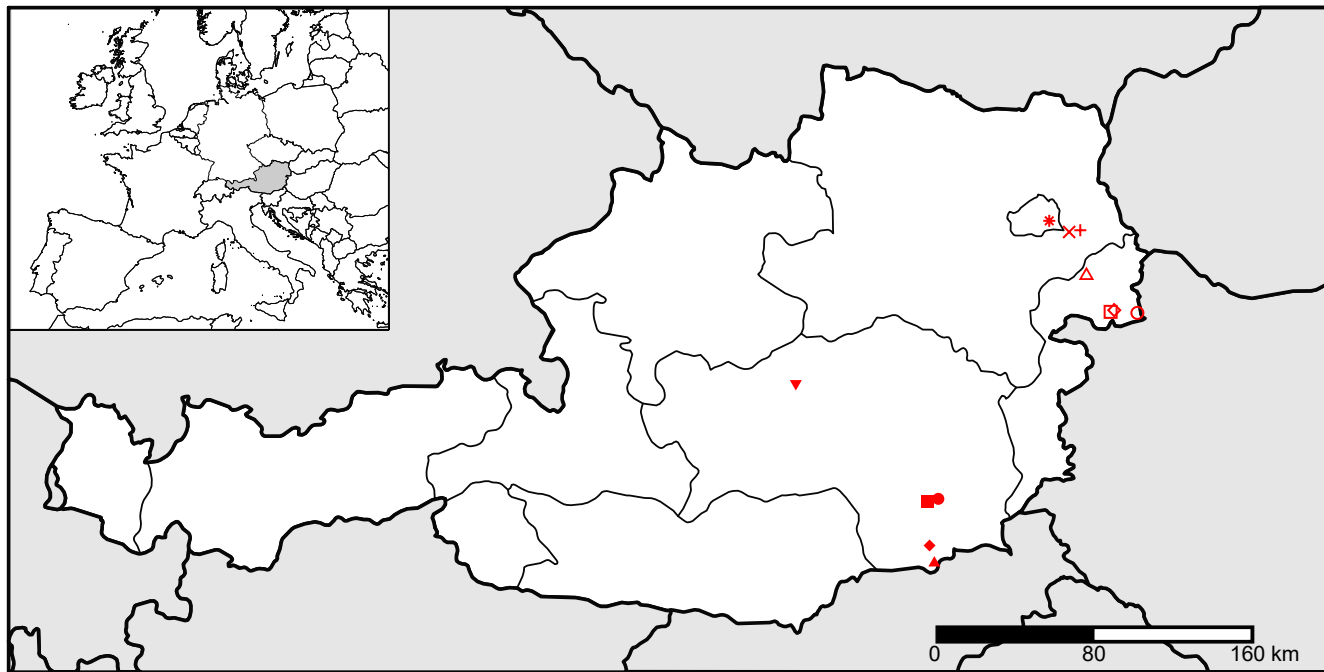

**Figure S1.** Map of the sampling sites for the present study in eastern Austria. Created with SimpleMappr (<http://www.simplemappr.net/>). The different symbols for each sampling site were used also in Figure S2. .
