# Supplementary material for: Inter- and Intrasexual Variation in Cuticular Hydrocarbons in Trichrysis cyanea (Linnaeus, 1758) (Hymenoptera: Chrysididae)
Source: MDPI journal article supplement (doi:10.3390/insects13020159), 2022-02-01
Supplement: s1 [file s1]

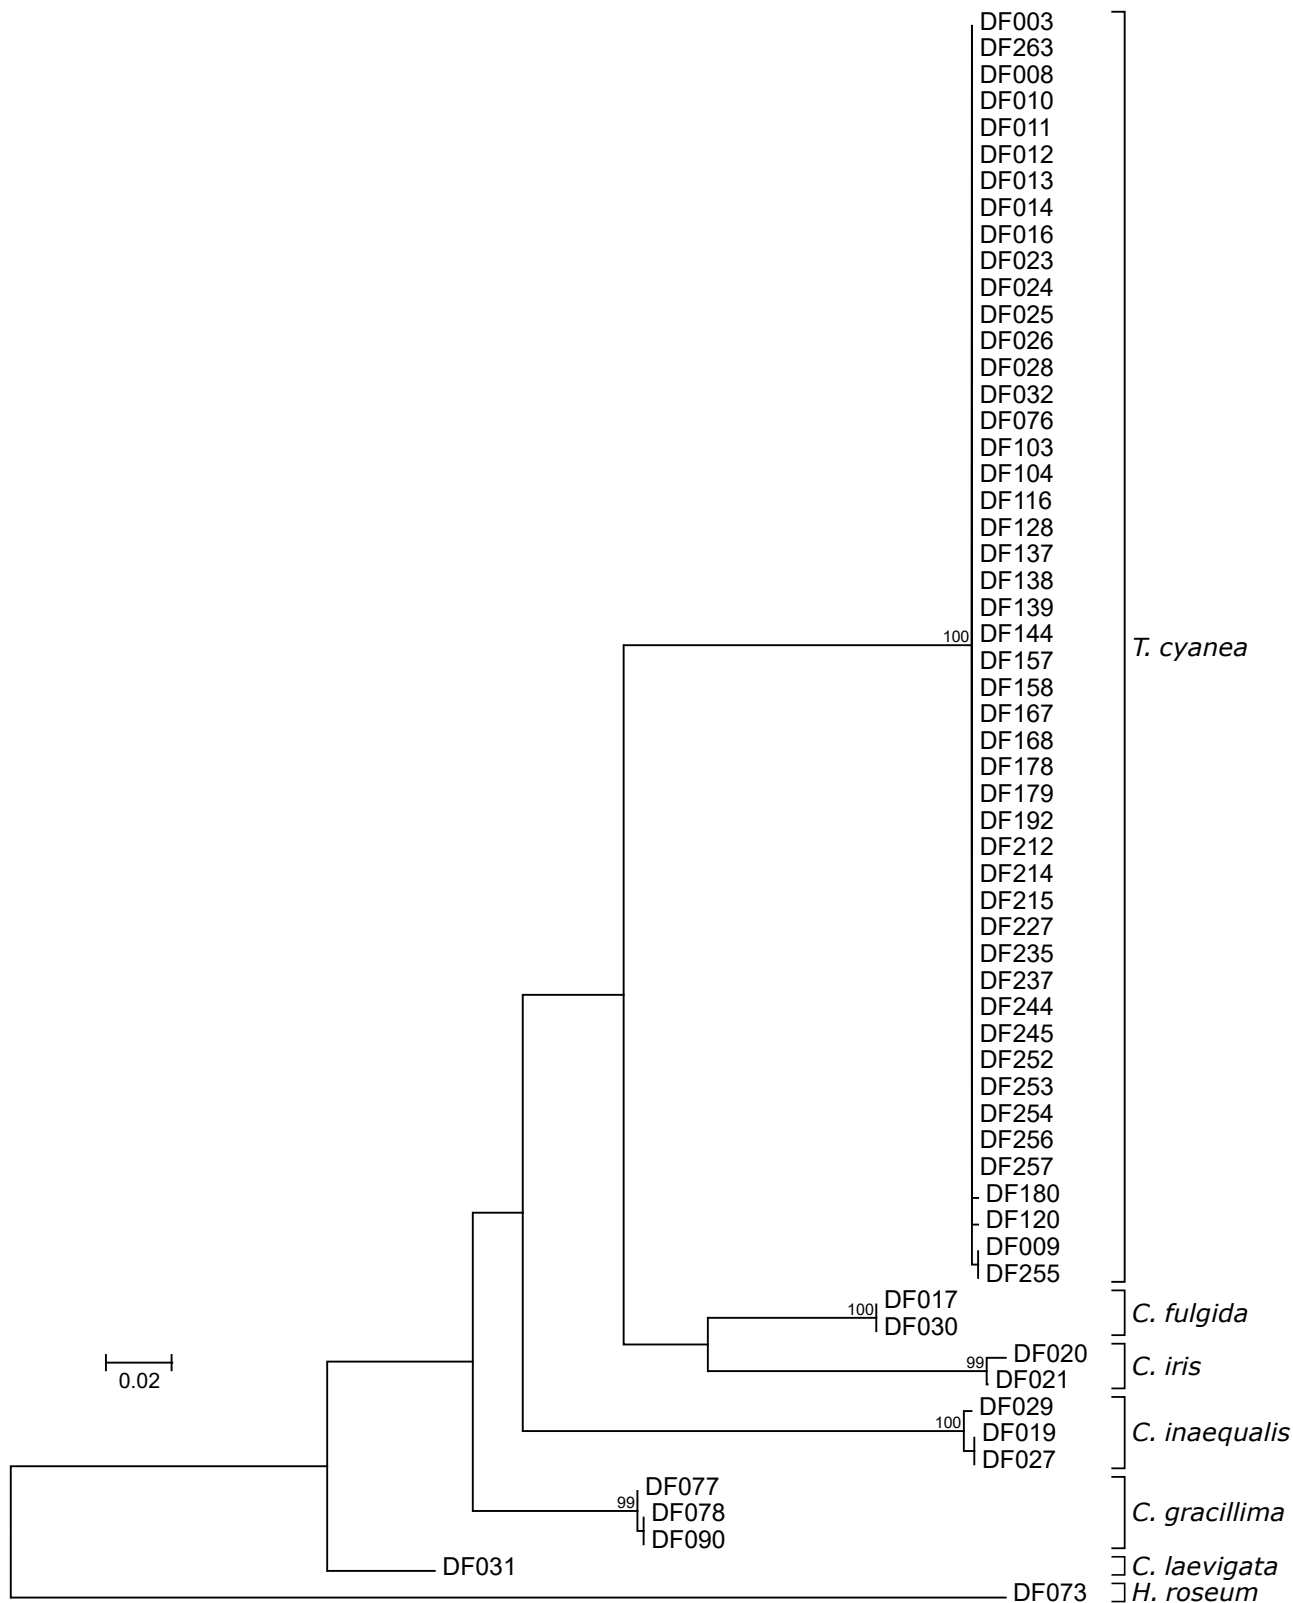

**Figure S3.** Maximum likelihood tree based on partial COI sequences of the collected specimens. Numbers at nodes indicate bootstrap support (only values >50 are shown).
