# Supplementary material for: Inter- and Intrasexual Variation in Cuticular Hydrocarbons in Trichrysis cyanea (Linnaeus, 1758) (Hymenoptera: Chrysididae)
Source: Insects. 2022 Feb 1;13(2):159. doi: 10.3390/insects13020159 (PMC8880203; doi:10.3390/insects13020159)
Supplement: Supplementary file 1 [file insects-13-00159-s001.zip]

Archive with 4 entries (4 files):
- FigureS1_insects.pdf
- FigureS2_insects.pdf
- FigureS3_insects.pdf
- TableS1.xlsx
