# Supplementary material for: Inter- and Intrasexual Variation in Cuticular Hydrocarbons in Trichrysis cyanea (Linnaeus, 1758) (Hymenoptera: Chrysididae)
Source: Insects. 2022 Feb 1;13(2):159. doi: 10.3390/insects13020159 (PMC8880203; doi:10.3390/insects13020159)
Supplement: Supplementary file 1 [file insects-13-00159-s001.zip › TableS1.xlsx]

## Sheet: Lab Sheet
Project:	BACHR			User:	David Froehlich
Created:	2021-09-02
Project Code	Process ID	Sample ID	Field ID	BIN	Catalog Num	COI-5P Seq. Length	COI-5P Trace Count	COI-5P Accession	Image Count	Barcode Compliant	Contamination	Stop Codon	Flagged Record	Collection Date	Identification	Life Stage	Extra Info	Voucher Type	Institution	Notes
BACHR	BACHR021-21	DF030	DF030	BOLD:AAP1068	9700	584[0n]	2		1	Yes				23-May-2017	Chrysis fulgida	adult		Vouchered:Registered Collection	Universalmuseum Joanneum, Graz
BACHR	BACHR022-21	DF031	DF031	BOLD:ACG1433	9701	657[0n]	2		1	Yes				29-May-2017	Chrysura laevigata	adult		Vouchered:Registered Collection	Universalmuseum Joanneum, Graz
BACHR	BACHR023-21	DF032	DF032	BOLD:AAH7935	9702	562[0n]	2		1	Yes				30-May-2017	Trichrysis cyanea	adult		Vouchered:Registered Collection	Universalmuseum Joanneum, Graz
BACHR	BACHR024-21	DF073	DF073	BOLD:AAU0775	9703	589[0n]	2		1	Yes				02-Jun-2017	Hedychridium roseum	adult		Vouchered:Registered Collection	Universalmuseum Joanneum, Graz
BACHR	BACHR025-21	DF076	DF076	BOLD:AAH7935	9704	657[0n]	2		1	Yes				06-Jun-2017	Trichrysis cyanea	adult		Vouchered:Registered Collection	Universalmuseum Joanneum, Graz
BACHR	BACHR026-21	DF077	DF077	BOLD:AAJ4865	9705	554[0n]	2		1	Yes				10-Jun-2017	Chrysis gracillima	adult		Vouchered:Registered Collection	Universalmuseum Joanneum, Graz
BACHR	BACHR027-21	DF078	DF078	BOLD:AAJ4865	9706	554[0n]	2		1	Yes				10-Jun-2017	Chrysis gracillima	adult		Vouchered:Registered Collection	Universalmuseum Joanneum, Graz
BACHR	BACHR028-21	DF090	DF090	BOLD:AAJ4865	9707	567[0n]	2		1	Yes				21-Jun-2017	Chrysis gracillima	adult		Vouchered:Registered Collection	Universalmuseum Joanneum, Graz
BACHR	BACHR029-21	DF103	DF103	BOLD:AAH7935	9708	657[0n]	2		1	Yes				15-Aug-2017	Trichrysis cyanea	adult		Vouchered:Registered Collection	Universalmuseum Joanneum, Graz
BACHR	BACHR030-21	DF104	DF104	BOLD:AAH7935	9709	657[0n]	2		1	Yes				15-Aug-2017	Trichrysis cyanea	adult		Vouchered:Registered Collection	Universalmuseum Joanneum, Graz
BACHR	BACHR031-21	DF116	DF116	BOLD:AAH7935	9710	652[0n]	2		1	Yes				31-Aug-2017	Trichrysis cyanea	adult		Vouchered:Registered Collection	Universalmuseum Joanneum, Graz
BACHR	BACHR032-21	DF118	DF118		9711	0[n]			1	No				08-Jul-2017	Trichrysis cyanea	adult		Vouchered:Registered Collection	Universalmuseum Joanneum, Graz
BACHR	BACHR033-21	DF119	DF119		9712	0[n]			1	No				08-Jul-2017	Trichrysis cyanea	adult		Vouchered:Registered Collection	Universalmuseum Joanneum, Graz
BACHR	BACHR034-21	DF120	DF120	BOLD:AAH7935	9713	541[0n]	2		1	Yes				08-Jul-2017	Trichrysis cyanea	adult		Vouchered:Registered Collection	Universalmuseum Joanneum, Graz
BACHR	BACHR035-21	DF128	DF128	BOLD:AAH7935	9714	575[1n]	2		1	Yes				14-Oct-2017	Trichrysis cyanea	adult		Vouchered:Registered Collection	Universalmuseum Joanneum, Graz
BACHR	BACHR036-21	DF137	DF137	BOLD:AAH7935	9715	541[1n]	2		1	Yes				28-Apr-2018	Trichrysis cyanea	adult		Vouchered:Registered Collection	Universalmuseum Joanneum, Graz
BACHR	BACHR037-21	DF138	DF138	BOLD:AAH7935	9716	541[1n]	2		1	Yes				28-Apr-2018	Trichrysis cyanea	adult		Vouchered:Registered Collection	Universalmuseum Joanneum, Graz
BACHR	BACHR038-21	DF139	DF139	BOLD:AAH7935	9717	541[1n]	2		1	Yes				28-Apr-2018	Trichrysis cyanea	adult		Vouchered:Registered Collection	Universalmuseum Joanneum, Graz
BACHR	BACHR039-21	DF144	DF144	BOLD:AAH7935	9718	552[0n]	2		1	Yes				29-Apr-2018	Trichrysis cyanea	adult		Vouchered:Registered Collection	Universalmuseum Joanneum, Graz
BACHR	BACHR040-21	DF157	DF157	BOLD:AAH7935	9719	541[2n]	2		1	Yes				30-Apr-2018	Trichrysis cyanea	adult		Vouchered:Registered Collection	Universalmuseum Joanneum, Graz
BACHR	BACHR041-21	DF158	DF158	BOLD:AAH7935	9720	570[0n]	2		1	No				30-Apr-2018	Trichrysis cyanea	adult		Vouchered:Registered Collection	Universalmuseum Joanneum, Graz
BACHR	BACHR042-21	DF164	DF164		9721	0[n]			1	No				30-Apr-2018	Trichrysis cyanea	adult		Vouchered:Registered Collection	Universalmuseum Joanneum, Graz
BACHR	BACHR043-21	DF167	DF167	BOLD:AAH7935	9722	580[3n]	2		1	No				23-May-2018	Trichrysis cyanea	adult		Vouchered:Registered Collection	Universalmuseum Joanneum, Graz
BACHR	BACHR044-21	DF168	DF168	BOLD:AAH7935	9723	596[0n]	2		1	Yes				23-May-2018	Trichrysis cyanea	adult		Vouchered:Registered Collection	Universalmuseum Joanneum, Graz
BACHR	BACHR045-21	DF178	DF178	BOLD:AAH7935	9724	584[3n]	2		1	No				25-May-2018	Trichrysis cyanea	adult		Vouchered:Registered Collection	Universalmuseum Joanneum, Graz
BACHR	BACHR046-21	DF179	DF179	BOLD:AAH7935	9725	620[0n]	2		1	Yes				25-May-2018	Trichrysis cyanea	adult		Vouchered:Registered Collection	Universalmuseum Joanneum, Graz
BACHR	BACHR047-21	DF180	DF180	BOLD:AAH7935	9726	560[0n]	2		1	Yes				25-May-2018	Trichrysis cyanea	adult		Vouchered:Registered Collection	Universalmuseum Joanneum, Graz
BACHR	BACHR048-21	DF192	DF192	BOLD:AAH7935	9727	623[0n]	2		1	Yes				05-Jun-2018	Trichrysis cyanea	adult		Vouchered:Registered Collection	Universalmuseum Joanneum, Graz
BACHR	BACHR049-21	DF212	DF212	BOLD:AAH7935	9728	599[0n]	2		1	Yes				05-Jun-2018	Trichrysis cyanea	adult		Vouchered:Registered Collection	Universalmuseum Joanneum, Graz
BACHR	BACHR050-21	DF214	DF214	BOLD:AAH7935	9729	610[0n]	2		1	Yes				06-Jun-2018	Trichrysis cyanea	adult		Vouchered:Registered Collection	Universalmuseum Joanneum, Graz
BACHR	BACHR051-21	DF215	DF215	BOLD:AAH7935	9730	626[0n]	2		1	Yes				06-Jun-2018	Trichrysis cyanea	adult		Vouchered:Registered Collection	Universalmuseum Joanneum, Graz
BACHR	BACHR052-21	DF227	DF227	BOLD:AAH7935	9731	623[0n]	2		1	Yes				21-Jun-2018	Trichrysis cyanea	adult		Vouchered:Registered Collection	Universalmuseum Joanneum, Graz
BACHR	BACHR053-21	DF235	DF235	BOLD:AAH7935	9732	605[0n]	2		1	Yes				21-Jun-2018	Trichrysis cyanea	adult		Vouchered:Registered Collection	Universalmuseum Joanneum, Graz
BACHR	BACHR054-21	DF237	DF237	BOLD:AAH7935	9733	615[0n]	2		1	Yes				20-Jun-2018	Trichrysis cyanea	adult		Vouchered:Registered Collection	Universalmuseum Joanneum, Graz
BACHR	BACHR055-21	DF244	DF244	BOLD:AAH7935	9734	592[1n]	2		1	Yes				29-Jun-2018	Trichrysis cyanea	adult		Vouchered:Registered Collection	Universalmuseum Joanneum, Graz
BACHR	BACHR056-21	DF245	DF245	BOLD:AAH7935	9735	585[0n]	2		1	Yes				29-Jun-2018	Trichrysis cyanea	adult		Vouchered:Registered Collection	Universalmuseum Joanneum, Graz
BACHR	BACHR057-21	DF252	DF252	BOLD:AAH7935	9736	591[0n]	2		1	Yes				05-Aug-2018	Trichrysis cyanea	adult		Vouchered:Registered Collection	Universalmuseum Joanneum, Graz
BACHR	BACHR058-21	DF253	DF253	BOLD:AAH7935	9737	586[0n]	2		1	Yes				05-Aug-2018	Trichrysis cyanea	adult		Vouchered:Registered Collection	Universalmuseum Joanneum, Graz
BACHR	BACHR059-21	DF254	DF254	BOLD:AAH7935	9738	587[0n]	2		1	Yes				05-Aug-2018	Trichrysis cyanea	adult		Vouchered:Registered Collection	Universalmuseum Joanneum, Graz
BACHR	BACHR060-21	DF255	DF255	BOLD:AAH7935	9739	587[1n]	2		1	Yes				05-Aug-2018	Trichrysis cyanea	adult		Vouchered:Registered Collection	Universalmuseum Joanneum, Graz
BACHR	BACHR061-21	DF256	DF256	BOLD:AAH7935	9740	590[1n]	2		1	Yes				05-Aug-2018	Trichrysis cyanea	adult		Vouchered:Registered Collection	Universalmuseum Joanneum, Graz
BACHR	BACHR062-21	DF257	DF257	BOLD:AAH7935	9741	587[1n]	2		1	Yes				05-Aug-2018	Trichrysis cyanea	adult		Vouchered:Registered Collection	Universalmuseum Joanneum, Graz
BACHR	BACHR063-21	DF260	DF260		9742	0[n]			1	No				13-Nov-2018	Trichrysis cyanea	adult		Vouchered:Registered Collection	Universalmuseum Joanneum, Graz
BACHR	BACHR064-21	DF263	DF263	BOLD:AAH7935	9743	575[1n]	2		1	Yes				13-Nov-2018	Trichrysis cyanea	adult		Vouchered:Registered Collection	Universalmuseum Joanneum, Graz
BACHR	BACHR001-21	DF003	DF003	BOLD:AAH7935	9680	657[0n]	2		1	Yes				15-Apr-2017	Trichrysis cyanea	adult		Vouchered:Registered Collection	Universalmuseum Joanneum, Graz
BACHR	BACHR002-21	DF008	DF008	BOLD:AAH7935	9681	606[0n]	2		1	Yes				25-Apr-2017	Trichrysis cyanea	adult		Vouchered:Registered Collection	Universalmuseum Joanneum, Graz
BACHR	BACHR003-21	DF009	DF009	BOLD:AAH7935	9682	657[0n]	2		1	Yes				07-May-2017	Trichrysis cyanea	adult		Vouchered:Registered Collection	Universalmuseum Joanneum, Graz
BACHR	BACHR004-21	DF010	DF010	BOLD:AAH7935	9683	581[0n]	2		1	Yes				13-May-2017	Trichrysis cyanea	adult		Vouchered:Registered Collection	Universalmuseum Joanneum, Graz
BACHR	BACHR005-21	DF011	DF011	BOLD:AAH7935	9684	657[0n]	2		1	No				13-May-2017	Trichrysis cyanea	adult		Vouchered:Registered Collection	Universalmuseum Joanneum, Graz
BACHR	BACHR006-21	DF012	DF012	BOLD:AAH7935	9685	657[0n]	2		1	Yes				13-May-2017	Trichrysis cyanea	adult		Vouchered:Registered Collection	Universalmuseum Joanneum, Graz
BACHR	BACHR007-21	DF013	DF013	BOLD:AAH7935	9686	657[0n]	2		1	Yes				13-May-2017	Trichrysis cyanea	adult		Vouchered:Registered Collection	Universalmuseum Joanneum, Graz
BACHR	BACHR008-21	DF014	DF014	BOLD:AAH7935	9687	657[0n]	2		1	Yes				13-May-2017	Trichrysis cyanea	adult		Vouchered:Registered Collection	Universalmuseum Joanneum, Graz
BACHR	BACHR009-21	DF016	DF016	BOLD:AAH7935	9688	657[0n]	2		1	Yes				13-May-2017	Trichrysis cyanea	adult		Vouchered:Registered Collection	Universalmuseum Joanneum, Graz
BACHR	BACHR010-21	DF017	DF017	BOLD:AAP1068	9689	649[0n]	2		1	Yes				13-May-2017	Chrysis fulgida	adult		Vouchered:Registered Collection	Universalmuseum Joanneum, Graz
BACHR	BACHR011-21	DF019	DF019	BOLD:AAV9307	9690	598[0n]	2		1	Yes				21-May-2017	Chrysis inaequalis	adult		Vouchered:Registered Collection	Universalmuseum Joanneum, Graz
BACHR	BACHR012-21	DF020	DF020	BOLD:ABU6374	9691	657[0n]	2		1	Yes				21-May-2017	Chrysis iris	adult		Vouchered:Registered Collection	Universalmuseum Joanneum, Graz
BACHR	BACHR013-21	DF021	DF021	BOLD:ABU6374	9692	657[0n]	2		1	Yes				21-May-2017	Chrysis iris	adult		Vouchered:Registered Collection	Universalmuseum Joanneum, Graz
BACHR	BACHR014-21	DF023	DF023	BOLD:AAH7935	9693	657[0n]	2		1	Yes				21-May-2017	Trichrysis cyanea	adult		Vouchered:Registered Collection	Universalmuseum Joanneum, Graz
BACHR	BACHR015-21	DF024	DF024	BOLD:AAH7935	9694	657[0n]	2		1	Yes				21-May-2017	Trichrysis cyanea	adult		Vouchered:Registered Collection	Universalmuseum Joanneum, Graz
BACHR	BACHR016-21	DF025	DF025	BOLD:AAH7935	9695	657[0n]	2		1	Yes				21-May-2017	Trichrysis cyanea	adult		Vouchered:Registered Collection	Universalmuseum Joanneum, Graz
BACHR	BACHR017-21	DF026	DF026	BOLD:AAH7935	9696	624[0n]	2		1	Yes				21-May-2017	Trichrysis cyanea	adult		Vouchered:Registered Collection	Universalmuseum Joanneum, Graz
BACHR	BACHR018-21	DF027	DF027	BOLD:AAV9307	9697	608[0n]	2		1	Yes				22-May-2017	Chrysis inaequalis	adult		Vouchered:Registered Collection	Universalmuseum Joanneum, Graz
BACHR	BACHR019-21	DF028	DF028	BOLD:AAH7935	9698	657[0n]	2		1	Yes				22-May-2017	Trichrysis cyanea	adult		Vouchered:Registered Collection	Universalmuseum Joanneum, Graz
BACHR	BACHR020-21	DF029	DF029	BOLD:AAV9307	9699	596[0n]	2		1	Yes				22-May-2017	Chrysis inaequalis	adult		Vouchered:Registered Collection	Universalmuseum Joanneum, Graz

## Sheet: Voucher Info
Project:	BACHR			User:	David Froehlich
Created:	2021-09-02
Sample ID	Field ID	Museum ID	Collection Code	Institution Storing
DF030	DF030	9700		Universalmuseum Joanneum, Graz
DF031	DF031	9701		Universalmuseum Joanneum, Graz
DF032	DF032	9702		Universalmuseum Joanneum, Graz
DF073	DF073	9703		Universalmuseum Joanneum, Graz
DF076	DF076	9704		Universalmuseum Joanneum, Graz
DF077	DF077	9705		Universalmuseum Joanneum, Graz
DF078	DF078	9706		Universalmuseum Joanneum, Graz
DF090	DF090	9707		Universalmuseum Joanneum, Graz
DF103	DF103	9708		Universalmuseum Joanneum, Graz
DF104	DF104	9709		Universalmuseum Joanneum, Graz
DF116	DF116	9710		Universalmuseum Joanneum, Graz
DF118	DF118	9711		Universalmuseum Joanneum, Graz
DF119	DF119	9712		Universalmuseum Joanneum, Graz
DF120	DF120	9713		Universalmuseum Joanneum, Graz
DF128	DF128	9714		Universalmuseum Joanneum, Graz
DF137	DF137	9715		Universalmuseum Joanneum, Graz
DF138	DF138	9716		Universalmuseum Joanneum, Graz
DF139	DF139	9717		Universalmuseum Joanneum, Graz
DF144	DF144	9718		Universalmuseum Joanneum, Graz
DF157	DF157	9719		Universalmuseum Joanneum, Graz
DF158	DF158	9720		Universalmuseum Joanneum, Graz
DF164	DF164	9721		Universalmuseum Joanneum, Graz
DF167	DF167	9722		Universalmuseum Joanneum, Graz
DF168	DF168	9723		Universalmuseum Joanneum, Graz
DF178	DF178	9724		Universalmuseum Joanneum, Graz
DF179	DF179	9725		Universalmuseum Joanneum, Graz
DF180	DF180	9726		Universalmuseum Joanneum, Graz
DF192	DF192	9727		Universalmuseum Joanneum, Graz
DF212	DF212	9728		Universalmuseum Joanneum, Graz
DF214	DF214	9729		Universalmuseum Joanneum, Graz
DF215	DF215	9730		Universalmuseum Joanneum, Graz
DF227	DF227	9731		Universalmuseum Joanneum, Graz
DF235	DF235	9732		Universalmuseum Joanneum, Graz
DF237	DF237	9733		Universalmuseum Joanneum, Graz
DF244	DF244	9734		Universalmuseum Joanneum, Graz
DF245	DF245	9735		Universalmuseum Joanneum, Graz
DF252	DF252	9736		Universalmuseum Joanneum, Graz
DF253	DF253	9737		Universalmuseum Joanneum, Graz
DF254	DF254	9738		Universalmuseum Joanneum, Graz
DF255	DF255	9739		Universalmuseum Joanneum, Graz
DF256	DF256	9740		Universalmuseum Joanneum, Graz
DF257	DF257	9741		Universalmuseum Joanneum, Graz
DF260	DF260	9742		Universalmuseum Joanneum, Graz
DF263	DF263	9743		Universalmuseum Joanneum, Graz
DF003	DF003	9680		Universalmuseum Joanneum, Graz
DF008	DF008	9681		Universalmuseum Joanneum, Graz
DF009	DF009	9682		Universalmuseum Joanneum, Graz
DF010	DF010	9683		Universalmuseum Joanneum, Graz
DF011	DF011	9684		Universalmuseum Joanneum, Graz
DF012	DF012	9685		Universalmuseum Joanneum, Graz
DF013	DF013	9686		Universalmuseum Joanneum, Graz
DF014	DF014	9687		Universalmuseum Joanneum, Graz
DF016	DF016	9688		Universalmuseum Joanneum, Graz
DF017	DF017	9689		Universalmuseum Joanneum, Graz
DF019	DF019	9690		Universalmuseum Joanneum, Graz
DF020	DF020	9691		Universalmuseum Joanneum, Graz
DF021	DF021	9692		Universalmuseum Joanneum, Graz
DF023	DF023	9693		Universalmuseum Joanneum, Graz
DF024	DF024	9694		Universalmuseum Joanneum, Graz
DF025	DF025	9695		Universalmuseum Joanneum, Graz
DF026	DF026	9696		Universalmuseum Joanneum, Graz
DF027	DF027	9697		Universalmuseum Joanneum, Graz
DF028	DF028	9698		Universalmuseum Joanneum, Graz
DF029	DF029	9699		Universalmuseum Joanneum, Graz

## Sheet: Taxonomy
Project:	BACHR			User:	David Froehlich
Created:	2021-09-02
Sample ID	Phylum	Class	Order	Family	Subfamily	Tribe	Genus	Species	Subspecies	Identifier	Identifier Email	Identification Method	Taxonomy Notes
DF030	Arthropoda	Insecta	Hymenoptera	Chrysididae	Chrysidinae		Chrysis	Chrysis fulgida		David Froehlich	david.froehlich@uni-graz.at	morphological
DF031	Arthropoda	Insecta	Hymenoptera	Chrysididae	Chrysidinae		Chrysura	Chrysura laevigata		David Froehlich	david.froehlich@uni-graz.at	morphological
DF032	Arthropoda	Insecta	Hymenoptera	Chrysididae	Chrysidinae		Trichrysis	Trichrysis cyanea		David Froehlich	david.froehlich@uni-graz.at	morphological
DF073	Arthropoda	Insecta	Hymenoptera	Chrysididae	Chrysidinae		Hedychridium	Hedychridium roseum		David Froehlich	david.froehlich@uni-graz.at	morphological
DF076	Arthropoda	Insecta	Hymenoptera	Chrysididae	Chrysidinae		Trichrysis	Trichrysis cyanea		David Froehlich	david.froehlich@uni-graz.at	morphological
DF077	Arthropoda	Insecta	Hymenoptera	Chrysididae	Chrysidinae		Chrysis	Chrysis gracillima		David Froehlich	david.froehlich@uni-graz.at	morphological
DF078	Arthropoda	Insecta	Hymenoptera	Chrysididae	Chrysidinae		Chrysis	Chrysis gracillima		David Froehlich	david.froehlich@uni-graz.at	morphological
DF090	Arthropoda	Insecta	Hymenoptera	Chrysididae	Chrysidinae		Chrysis	Chrysis gracillima		David Froehlich	david.froehlich@uni-graz.at	morphological
DF103	Arthropoda	Insecta	Hymenoptera	Chrysididae	Chrysidinae		Trichrysis	Trichrysis cyanea		David Froehlich	david.froehlich@uni-graz.at	morphological
DF104	Arthropoda	Insecta	Hymenoptera	Chrysididae	Chrysidinae		Trichrysis	Trichrysis cyanea		David Froehlich	david.froehlich@uni-graz.at	morphological
DF116	Arthropoda	Insecta	Hymenoptera	Chrysididae	Chrysidinae		Trichrysis	Trichrysis cyanea		David Froehlich	david.froehlich@uni-graz.at	morphological
DF118	Arthropoda	Insecta	Hymenoptera	Chrysididae	Chrysidinae		Trichrysis	Trichrysis cyanea		David Froehlich	david.froehlich@uni-graz.at	morphological
DF119	Arthropoda	Insecta	Hymenoptera	Chrysididae	Chrysidinae		Trichrysis	Trichrysis cyanea		David Froehlich	david.froehlich@uni-graz.at	morphological
DF120	Arthropoda	Insecta	Hymenoptera	Chrysididae	Chrysidinae		Trichrysis	Trichrysis cyanea		David Froehlich	david.froehlich@uni-graz.at	morphological
DF128	Arthropoda	Insecta	Hymenoptera	Chrysididae	Chrysidinae		Trichrysis	Trichrysis cyanea		David Froehlich	david.froehlich@uni-graz.at	morphological
DF137	Arthropoda	Insecta	Hymenoptera	Chrysididae	Chrysidinae		Trichrysis	Trichrysis cyanea		David Froehlich	david.froehlich@uni-graz.at	morphological
DF138	Arthropoda	Insecta	Hymenoptera	Chrysididae	Chrysidinae		Trichrysis	Trichrysis cyanea		David Froehlich	david.froehlich@uni-graz.at	morphological
DF139	Arthropoda	Insecta	Hymenoptera	Chrysididae	Chrysidinae		Trichrysis	Trichrysis cyanea		David Froehlich	david.froehlich@uni-graz.at	morphological
DF144	Arthropoda	Insecta	Hymenoptera	Chrysididae	Chrysidinae		Trichrysis	Trichrysis cyanea		David Froehlich	david.froehlich@uni-graz.at	morphological
DF157	Arthropoda	Insecta	Hymenoptera	Chrysididae	Chrysidinae		Trichrysis	Trichrysis cyanea		David Froehlich	david.froehlich@uni-graz.at	morphological
DF158	Arthropoda	Insecta	Hymenoptera	Chrysididae	Chrysidinae		Trichrysis	Trichrysis cyanea		David Froehlich	david.froehlich@uni-graz.at	morphological
DF164	Arthropoda	Insecta	Hymenoptera	Chrysididae	Chrysidinae		Trichrysis	Trichrysis cyanea		David Froehlich	david.froehlich@uni-graz.at	morphological
DF167	Arthropoda	Insecta	Hymenoptera	Chrysididae	Chrysidinae		Trichrysis	Trichrysis cyanea		David Froehlich	david.froehlich@uni-graz.at	morphological
DF168	Arthropoda	Insecta	Hymenoptera	Chrysididae	Chrysidinae		Trichrysis	Trichrysis cyanea		David Froehlich	david.froehlich@uni-graz.at	morphological
DF178	Arthropoda	Insecta	Hymenoptera	Chrysididae	Chrysidinae		Trichrysis	Trichrysis cyanea		David Froehlich	david.froehlich@uni-graz.at	morphological
DF179	Arthropoda	Insecta	Hymenoptera	Chrysididae	Chrysidinae		Trichrysis	Trichrysis cyanea		David Froehlich	david.froehlich@uni-graz.at	morphological
DF180	Arthropoda	Insecta	Hymenoptera	Chrysididae	Chrysidinae		Trichrysis	Trichrysis cyanea		David Froehlich	david.froehlich@uni-graz.at	morphological
DF192	Arthropoda	Insecta	Hymenoptera	Chrysididae	Chrysidinae		Trichrysis	Trichrysis cyanea		David Froehlich	david.froehlich@uni-graz.at	morphological
DF212	Arthropoda	Insecta	Hymenoptera	Chrysididae	Chrysidinae		Trichrysis	Trichrysis cyanea		David Froehlich	david.froehlich@uni-graz.at	morphological
DF214	Arthropoda	Insecta	Hymenoptera	Chrysididae	Chrysidinae		Trichrysis	Trichrysis cyanea		David Froehlich	david.froehlich@uni-graz.at	morphological
DF215	Arthropoda	Insecta	Hymenoptera	Chrysididae	Chrysidinae		Trichrysis	Trichrysis cyanea		David Froehlich	david.froehlich@uni-graz.at	morphological
DF227	Arthropoda	Insecta	Hymenoptera	Chrysididae	Chrysidinae		Trichrysis	Trichrysis cyanea		David Froehlich	david.froehlich@uni-graz.at	morphological
DF235	Arthropoda	Insecta	Hymenoptera	Chrysididae	Chrysidinae		Trichrysis	Trichrysis cyanea		David Froehlich	david.froehlich@uni-graz.at	morphological
DF237	Arthropoda	Insecta	Hymenoptera	Chrysididae	Chrysidinae		Trichrysis	Trichrysis cyanea		David Froehlich	david.froehlich@uni-graz.at	morphological
DF244	Arthropoda	Insecta	Hymenoptera	Chrysididae	Chrysidinae		Trichrysis	Trichrysis cyanea		David Froehlich	david.froehlich@uni-graz.at	morphological
DF245	Arthropoda	Insecta	Hymenoptera	Chrysididae	Chrysidinae		Trichrysis	Trichrysis cyanea		David Froehlich	david.froehlich@uni-graz.at	morphological
DF252	Arthropoda	Insecta	Hymenoptera	Chrysididae	Chrysidinae		Trichrysis	Trichrysis cyanea		David Froehlich	david.froehlich@uni-graz.at	morphological
DF253	Arthropoda	Insecta	Hymenoptera	Chrysididae	Chrysidinae		Trichrysis	Trichrysis cyanea		David Froehlich	david.froehlich@uni-graz.at	morphological
DF254	Arthropoda	Insecta	Hymenoptera	Chrysididae	Chrysidinae		Trichrysis	Trichrysis cyanea		David Froehlich	david.froehlich@uni-graz.at	morphological
DF255	Arthropoda	Insecta	Hymenoptera	Chrysididae	Chrysidinae		Trichrysis	Trichrysis cyanea		David Froehlich	david.froehlich@uni-graz.at	morphological
DF256	Arthropoda	Insecta	Hymenoptera	Chrysididae	Chrysidinae		Trichrysis	Trichrysis cyanea		David Froehlich	david.froehlich@uni-graz.at	morphological
DF257	Arthropoda	Insecta	Hymenoptera	Chrysididae	Chrysidinae		Trichrysis	Trichrysis cyanea		David Froehlich	david.froehlich@uni-graz.at	morphological
DF260	Arthropoda	Insecta	Hymenoptera	Chrysididae	Chrysidinae		Trichrysis	Trichrysis cyanea		David Froehlich	david.froehlich@uni-graz.at	morphological
DF263	Arthropoda	Insecta	Hymenoptera	Chrysididae	Chrysidinae		Trichrysis	Trichrysis cyanea		David Froehlich	david.froehlich@uni-graz.at	morphological
DF003	Arthropoda	Insecta	Hymenoptera	Chrysididae	Chrysidinae		Trichrysis	Trichrysis cyanea		David Froehlich	david.froehlich@uni-graz.at	morphological
DF008	Arthropoda	Insecta	Hymenoptera	Chrysididae	Chrysidinae		Trichrysis	Trichrysis cyanea		David Froehlich	david.froehlich@uni-graz.at	morphological
DF009	Arthropoda	Insecta	Hymenoptera	Chrysididae	Chrysidinae		Trichrysis	Trichrysis cyanea		David Froehlich	david.froehlich@uni-graz.at	morphological
DF010	Arthropoda	Insecta	Hymenoptera	Chrysididae	Chrysidinae		Trichrysis	Trichrysis cyanea		David Froehlich	david.froehlich@uni-graz.at	morphological
DF011	Arthropoda	Insecta	Hymenoptera	Chrysididae	Chrysidinae		Trichrysis	Trichrysis cyanea		David Froehlich	david.froehlich@uni-graz.at	morphological
DF012	Arthropoda	Insecta	Hymenoptera	Chrysididae	Chrysidinae		Trichrysis	Trichrysis cyanea		David Froehlich	david.froehlich@uni-graz.at	morphological
DF013	Arthropoda	Insecta	Hymenoptera	Chrysididae	Chrysidinae		Trichrysis	Trichrysis cyanea		David Froehlich	david.froehlich@uni-graz.at	morphological
DF014	Arthropoda	Insecta	Hymenoptera	Chrysididae	Chrysidinae		Trichrysis	Trichrysis cyanea		David Froehlich	david.froehlich@uni-graz.at	morphological
DF016	Arthropoda	Insecta	Hymenoptera	Chrysididae	Chrysidinae		Trichrysis	Trichrysis cyanea		David Froehlich	david.froehlich@uni-graz.at	morphological
DF017	Arthropoda	Insecta	Hymenoptera	Chrysididae	Chrysidinae		Chrysis	Chrysis fulgida		David Froehlich	david.froehlich@uni-graz.at	morphological
DF019	Arthropoda	Insecta	Hymenoptera	Chrysididae	Chrysidinae		Chrysis	Chrysis inaequalis		David Froehlich	david.froehlich@uni-graz.at	morphological
DF020	Arthropoda	Insecta	Hymenoptera	Chrysididae	Chrysidinae		Chrysis	Chrysis iris		David Froehlich	david.froehlich@uni-graz.at	morphological
DF021	Arthropoda	Insecta	Hymenoptera	Chrysididae	Chrysidinae		Chrysis	Chrysis iris		David Froehlich	david.froehlich@uni-graz.at	morphological
DF023	Arthropoda	Insecta	Hymenoptera	Chrysididae	Chrysidinae		Trichrysis	Trichrysis cyanea		David Froehlich	david.froehlich@uni-graz.at	morphological
DF024	Arthropoda	Insecta	Hymenoptera	Chrysididae	Chrysidinae		Trichrysis	Trichrysis cyanea		David Froehlich	david.froehlich@uni-graz.at	morphological
DF025	Arthropoda	Insecta	Hymenoptera	Chrysididae	Chrysidinae		Trichrysis	Trichrysis cyanea		David Froehlich	david.froehlich@uni-graz.at	morphological
DF026	Arthropoda	Insecta	Hymenoptera	Chrysididae	Chrysidinae		Trichrysis	Trichrysis cyanea		David Froehlich	david.froehlich@uni-graz.at	morphological
DF027	Arthropoda	Insecta	Hymenoptera	Chrysididae	Chrysidinae		Chrysis	Chrysis inaequalis		David Froehlich	david.froehlich@uni-graz.at	morphological
DF028	Arthropoda	Insecta	Hymenoptera	Chrysididae	Chrysidinae		Trichrysis	Trichrysis cyanea		David Froehlich	david.froehlich@uni-graz.at	morphological
DF029	Arthropoda	Insecta	Hymenoptera	Chrysididae	Chrysidinae		Chrysis	Chrysis inaequalis		David Froehlich	david.froehlich@uni-graz.at	morphological

## Sheet: Specimen Details
Project:	BACHR			User:	David Froehlich
Created:	2021-09-02
Sample ID	Sex	Reproduction	Life Stage	Extra Info	Notes	Voucher Status	Tissue Descriptor	External URLs	Associated Taxa	Associated Specimens
DF030	F	S	adult			Vouchered:Registered Collection	leg
DF031	F	S	adult			Vouchered:Registered Collection	leg
DF032	M	S	adult			Vouchered:Registered Collection	leg
DF073	F	S	adult			Vouchered:Registered Collection	leg
DF076	F	S	adult			Vouchered:Registered Collection	leg
DF077	M	S	adult			Vouchered:Registered Collection	leg
DF078	F	S	adult			Vouchered:Registered Collection	leg
DF090	F	S	adult			Vouchered:Registered Collection	leg
DF103	F	S	adult			Vouchered:Registered Collection	leg
DF104	F	S	adult			Vouchered:Registered Collection	leg
DF116	F	S	adult			Vouchered:Registered Collection	leg
DF118	M	S	adult			Vouchered:Registered Collection	leg
DF119	F	S	adult			Vouchered:Registered Collection	leg
DF120	M	S	adult			Vouchered:Registered Collection	leg
DF128	F	S	adult			Vouchered:Registered Collection	leg
DF137	F	S	adult			Vouchered:Registered Collection	leg
DF138	M	S	adult			Vouchered:Registered Collection	leg
DF139	M	S	adult			Vouchered:Registered Collection	leg
DF144	M	S	adult			Vouchered:Registered Collection	leg
DF157	M	S	adult			Vouchered:Registered Collection	leg
DF158	M	S	adult			Vouchered:Registered Collection	leg
DF164	M	S	adult			Vouchered:Registered Collection	leg
DF167	F	S	adult			Vouchered:Registered Collection	leg
DF168	F	S	adult			Vouchered:Registered Collection	leg
DF178	M	S	adult			Vouchered:Registered Collection	leg
DF179	F	S	adult			Vouchered:Registered Collection	leg
DF180	M	S	adult			Vouchered:Registered Collection	leg
DF192	F	S	adult			Vouchered:Registered Collection	leg
DF212	F	S	adult			Vouchered:Registered Collection	leg
DF214	F	S	adult			Vouchered:Registered Collection	leg
DF215	M	S	adult			Vouchered:Registered Collection	leg
DF227	M	S	adult			Vouchered:Registered Collection	leg
DF235	F	S	adult			Vouchered:Registered Collection	leg
DF237	F	S	adult			Vouchered:Registered Collection	leg
DF244	M	S	adult			Vouchered:Registered Collection	leg
DF245	M	S	adult			Vouchered:Registered Collection	leg
DF252	M	S	adult			Vouchered:Registered Collection	leg
DF253	F	S	adult			Vouchered:Registered Collection	leg
DF254	M	S	adult			Vouchered:Registered Collection	leg
DF255	M	S	adult			Vouchered:Registered Collection	leg
DF256	F	S	adult			Vouchered:Registered Collection	leg
DF257	F	S	adult			Vouchered:Registered Collection	leg
DF260	F	S	adult			Vouchered:Registered Collection	leg
DF263	F	S	adult			Vouchered:Registered Collection	leg
DF003	M	S	adult			Vouchered:Registered Collection	leg
DF008	F	S	adult			Vouchered:Registered Collection	leg
DF009	F	S	adult			Vouchered:Registered Collection	leg
DF010	M	S	adult			Vouchered:Registered Collection	leg
DF011	M	S	adult			Vouchered:Registered Collection	leg
DF012	M	S	adult			Vouchered:Registered Collection	leg
DF013	M	S	adult			Vouchered:Registered Collection	leg
DF014	M	S	adult			Vouchered:Registered Collection	leg
DF016	M	S	adult			Vouchered:Registered Collection	leg
DF017	F	S	adult			Vouchered:Registered Collection	leg
DF019	M	S	adult			Vouchered:Registered Collection	leg
DF020	F	S	adult			Vouchered:Registered Collection	leg
DF021	M	S	adult			Vouchered:Registered Collection	leg
DF023	F	S	adult			Vouchered:Registered Collection	leg
DF024	M	S	adult			Vouchered:Registered Collection	leg
DF025	M	S	adult			Vouchered:Registered Collection	leg
DF026	M	S	adult			Vouchered:Registered Collection	leg
DF027	M	S	adult			Vouchered:Registered Collection	leg
DF028	F	S	adult			Vouchered:Registered Collection	leg
DF029	M	S	adult			Vouchered:Registered Collection	leg

## Sheet: Collection Data
Project:	BACHR			User:	David Froehlich
Created:	2021-09-02
Sample ID	Collectors	Collection Date	Country/Ocean	State/Province	Region	Sector	Exact Site	Lat	Lon	Elev	Depth	Elevation Precision	Depth Precision	GPS Source	Coordinate Accuracy	Event Time	Collection Date Accuracy	Habitat	Sampling Protocol	Collection Notes	Site Code	Collection Event ID
DF030	Frohlich, David	23-May-2017	Austria	Styria			Heiligenkreuz am Waasen	46.959	15.582	356				Google Earth	15
DF031	Frohlich, David	29-May-2017	Austria	Burgenland			Bernstein, aufgelassener Steinbruch	47.413	16.289	634				Google Earth	15
DF032	Frohlich, David	30-May-2017	Austria	Burgenland			Apetlon, Lange Lacke	47.757	16.886	119				Google Earth	15
DF073	Frohlich, David	02-Jun-2017	Austria	Burgenland			Breitenbrunn, Thenauriegel	47.938	16.718	166				Google Earth	15
DF076	Frohlich, David	06-Jun-2017	Austria	Styria			Enzelsdorf	46.948	15.504	310				Google Earth	15
DF077	Frohlich, David	10-Jun-2017	Austria	Styria			Heiligenkreuz am Waasen	46.959	15.582	356				Google Earth	15
DF078	Frohlich, David	10-Jun-2017	Austria	Styria			Heiligenkreuz am Waasen	46.959	15.582	356				Google Earth	15
DF090	Frohlich, David	21-Jun-2017	Austria	Styria			Heiligenkreuz am Waasen	46.959	15.582	356				Google Earth	15
DF103	Frohlich, David	15-Aug-2017	Austria	Styria			Heiligenkreuz am Waasen	46.959	15.582	356				Google Earth	15
DF104	Frohlich, David	15-Aug-2017	Austria	Styria			Heiligenkreuz am Waasen	46.959	15.582	356				Google Earth	15
DF116	Frohlich, David	31-Aug-2017	Austria	Styria			Heiligenkreuz am Waasen	46.959	15.582	356				Google Earth	15
DF118	Frohlich, David	08-Jul-2017	Austria	Styria			Heimschuh	46.727	15.486	425				Google Earth	15
DF119	Frohlich, David	08-Jul-2017	Austria	Styria			Heimschuh	46.727	15.486	425				Google Earth	15
DF120	Frohlich, David	08-Jul-2017	Austria	Styria			Heimschuh	46.727	15.486	425				Google Earth	15
DF128	Frohlich, David	14-Oct-2017	Austria	Styria			Heiligenkreuz am Waasen	46.959	15.582	356				Google Earth	15
DF137	Frohlich, David	28-Apr-2018	Austria	Lower Austria			Orth an der Donau	48.143	16.7	148				Google Earth	15
DF138	Frohlich, David	28-Apr-2018	Austria	Lower Austria			Orth an der Donau	48.143	16.7	148				Google Earth	15
DF139	Frohlich, David	28-Apr-2018	Austria	Lower Austria			Orth an der Donau	48.143	16.7	148				Google Earth	15
DF144	Frohlich, David	29-Apr-2018	Austria	Lower Austria			Schonau an der Donau	48.136	16.618	154				Google Earth	15
DF157	Frohlich, David	30-Apr-2018	Austria	Vienna			Josefssteg, Fuchshaufel	48.193	16.485	156				Google Earth	15
DF158	Frohlich, David	30-Apr-2018	Austria	Vienna			Josefssteg, Fuchshaufel	48.193	16.485	156				Google Earth	15
DF164	Frohlich, David	30-Apr-2018	Austria	Vienna			Josefssteg, Fuchshaufel	48.193	16.485	156				Google Earth	15
DF167	Frohlich, David	23-May-2018	Austria	Styria			Heiligenkreuz am Waasen	46.959	15.582	356				Google Earth	15
DF168	Frohlich, David	23-May-2018	Austria	Styria			Heiligenkreuz am Waasen	46.959	15.582	356				Google Earth	15
DF178	Frohlich, David	25-May-2018	Austria	Styria			Glanz an der Weinstrasse	46.656	15.523	424				Google Earth	15
DF179	Frohlich, David	25-May-2018	Austria	Styria			Glanz an der Weinstrasse	46.656	15.523	424				Google Earth	15
DF180	Frohlich, David	25-May-2018	Austria	Styria			Glanz an der Weinstrasse	46.656	15.52	356				Google Earth	15
DF192	Frohlich, David	05-Jun-2018	Austria	Burgenland			Breitenbrunn, Thenauriegel	47.938	16.718	166				Google Earth	15
DF212	Frohlich, David	05-Jun-2018	Austria	Burgenland			Apetlon, Lange Lacke	47.752	16.868	119				Google Earth	15
DF214	Frohlich, David	06-Jun-2018	Austria	Burgenland			Andau,Hansag	47.737	17.048	115				Google Earth	15
DF215	Frohlich, David	06-Jun-2018	Austria	Burgenland			Andau,Hansag	47.737	17.048	115				Google Earth	15
DF227	Frohlich, David	21-Jun-2018	Austria	Styria			Heiligenkreuz am Waasen	46.959	15.582	356				Google Earth	15
DF235	Frohlich, David	21-Jun-2018	Austria	Styria			Heiligenkreuz am Waasen	46.959	15.582	356				Google Earth	15
DF237	Frohlich, David	20-Jun-2018	Austria	Styria			Johnsbach, Ebneralm	47.528	14.652	1266				Google Earth	15
DF244	Frohlich, David	29-Jun-2018	Austria	Styria			Heiligenkreuz am Waasen	46.959	15.582	356				Google Earth	15
DF245	Frohlich, David	29-Jun-2018	Austria	Styria			Heiligenkreuz am Waasen	46.959	15.582	356				Google Earth	15
DF252	Frohlich, David	05-Aug-2018	Austria	Styria			Heiligenkreuz am Waasen	46.959	15.582	356				Google Earth	15
DF253	Frohlich, David	05-Aug-2018	Austria	Styria			Heiligenkreuz am Waasen	46.959	15.582	356				Google Earth	15
DF254	Frohlich, David	05-Aug-2018	Austria	Styria			Heiligenkreuz am Waasen	46.959	15.582	356				Google Earth	15
DF255	Frohlich, David	05-Aug-2018	Austria	Styria			Heiligenkreuz am Waasen	46.959	15.582	356				Google Earth	15
DF256	Frohlich, David	05-Aug-2018	Austria	Styria			Heiligenkreuz am Waasen	46.959	15.582	356				Google Earth	15
DF257	Frohlich, David	05-Aug-2018	Austria	Styria			Heiligenkreuz am Waasen	46.959	15.582	356				Google Earth	15
DF260	Frohlich, David	13-Nov-2018	Austria	Styria			Heiligenkreuz am Waasen	46.959	15.582	356				Google Earth	15
DF263	Frohlich, David	13-Nov-2018	Austria	Styria			Heiligenkreuz am Waasen	46.959	15.582	356				Google Earth	15
DF003	Frohlich, David	15-Apr-2017	Austria	Styria			Heiligenkreuz am Waasen	46.959	15.582	356				Google Earth	15
DF008	Frohlich, David	25-Apr-2017	Austria	Styria			Heiligenkreuz am Waasen	46.959	15.582	356				Google Earth	15
DF009	Frohlich, David	07-May-2017	Austria	Styria			Heiligenkreuz am Waasen	46.959	15.582	356				Google Earth	15
DF010	Frohlich, David	13-May-2017	Austria	Styria			Heiligenkreuz am Waasen	46.959	15.582	356				Google Earth	15
DF011	Frohlich, David	13-May-2017	Austria	Styria			Heiligenkreuz am Waasen	46.959	15.582	356				Google Earth	15
DF012	Frohlich, David	13-May-2017	Austria	Styria			Heiligenkreuz am Waasen	46.959	15.582	356				Google Earth	15
DF013	Frohlich, David	13-May-2017	Austria	Styria			Heiligenkreuz am Waasen	46.959	15.582	356				Google Earth	15
DF014	Frohlich, David	13-May-2017	Austria	Styria			Heiligenkreuz am Waasen	46.959	15.582	356				Google Earth	15
DF016	Frohlich, David	13-May-2017	Austria	Styria			Heiligenkreuz am Waasen	46.959	15.582	356				Google Earth	15
DF017	Frohlich, David	13-May-2017	Austria	Styria			Heiligenkreuz am Waasen	46.959	15.582	356				Google Earth	15
DF019	Frohlich, David	21-May-2017	Austria	Styria			Heiligenkreuz am Waasen	46.959	15.582	356				Google Earth	15
DF020	Frohlich, David	21-May-2017	Austria	Styria			Heiligenkreuz am Waasen	46.959	15.582	356				Google Earth	15
DF021	Frohlich, David	21-May-2017	Austria	Styria			Heiligenkreuz am Waasen	46.959	15.582	356				Google Earth	15
DF023	Frohlich, David	21-May-2017	Austria	Styria			Heiligenkreuz am Waasen	46.959	15.582	356				Google Earth	15
DF024	Frohlich, David	21-May-2017	Austria	Styria			Heiligenkreuz am Waasen	46.959	15.582	356				Google Earth	15
DF025	Frohlich, David	21-May-2017	Austria	Styria			Heiligenkreuz am Waasen	46.959	15.582	356				Google Earth	15
DF026	Frohlich, David	21-May-2017	Austria	Styria			Heiligenkreuz am Waasen	46.959	15.582	356				Google Earth	15
DF027	Frohlich, David	22-May-2017	Austria	Styria			Heiligenkreuz am Waasen	46.959	15.582	356				Google Earth	15
DF028	Frohlich, David	22-May-2017	Austria	Styria			Heiligenkreuz am Waasen	46.959	15.582	356				Google Earth	15
DF029	Frohlich, David	22-May-2017	Austria	Styria			Heiligenkreuz am Waasen	46.959	15.582	356				Google Earth	15
